# Supplementary material for: An integrated network pharmacology and metabolomics approach to reveal the immunomodulatory mechanism of Brassica rapa L. (Tibetan Turnip) in fatigue mice
Source: Royal Society of Chemistry journal article supplement (doi:10.1039/d2fo02308c), 2022-01-01
Supplement: d2fo02308c1.pdf [file d2fo02308c1.pdf]

## Supplementary materials

Table S1 The MS and MS<sup>2</sup> spectra of compounds in BE

| Name                         | MS and MS <sup>2</sup> spectra                                                       |
|------------------------------|--------------------------------------------------------------------------------------|
| 2-Phenylethyl isothiocyanate | 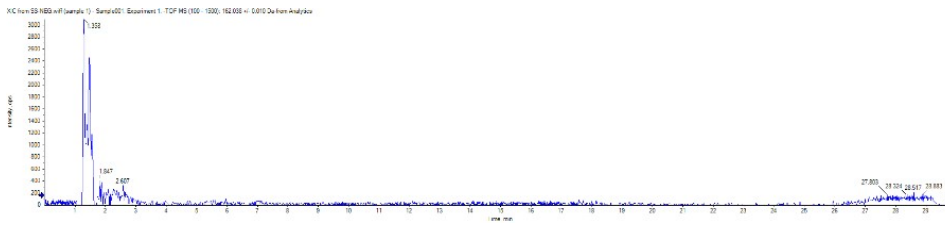   |
| Caffeic acid                 |    |
| Triandrin                    |   |
| 5-Methylthiopen-1            |  |
| Quinic acid                  |  |

Licochalcone

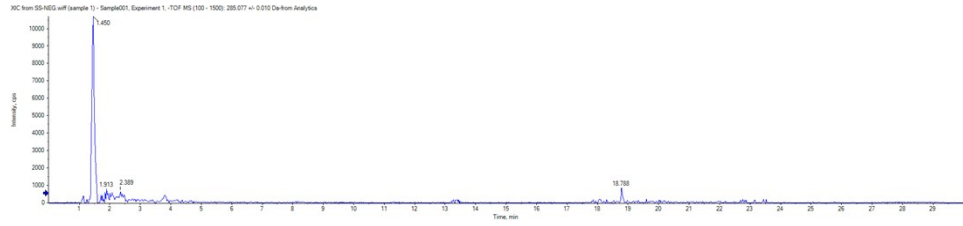

Sucrose

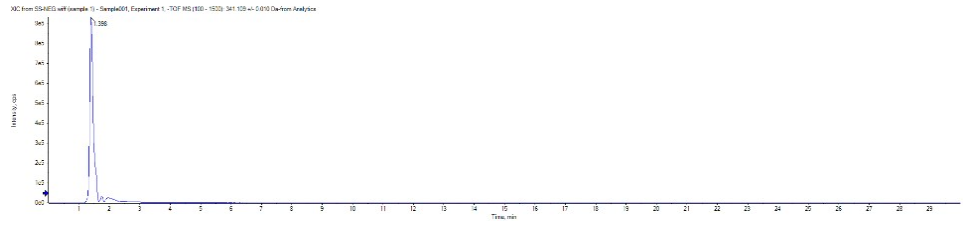

Ethyl benzoate

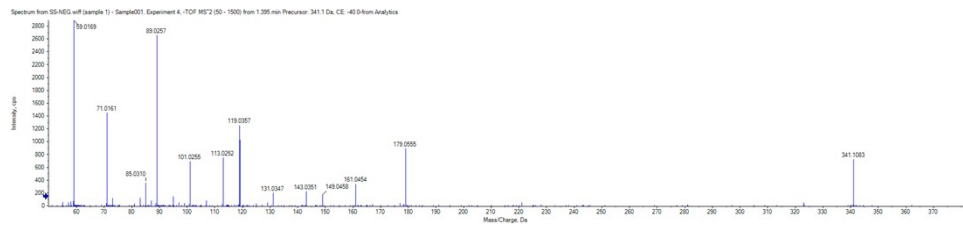

4-Hydroxyglucobrassicin

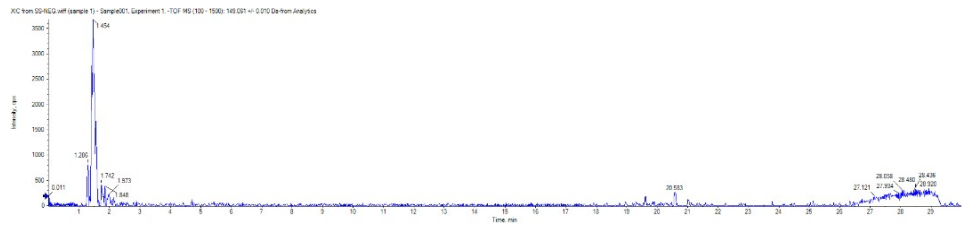

Gluconasturtiin

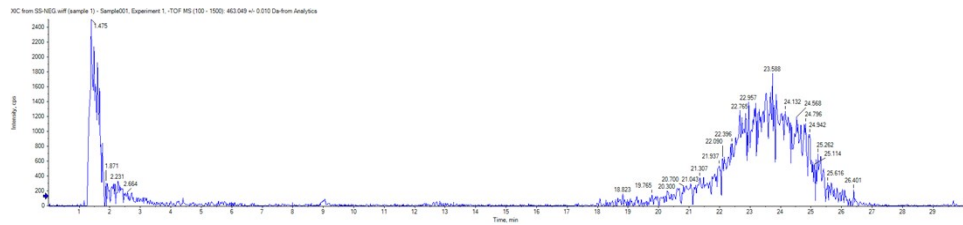

2-Naphthyl-β-D-glucopyranoside

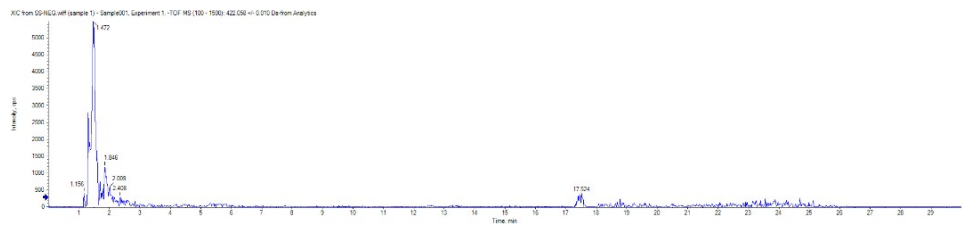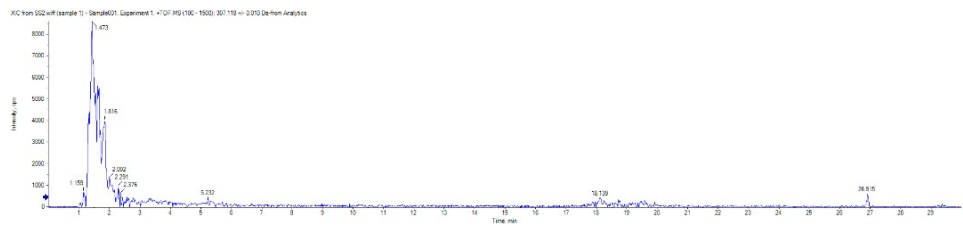

# Liquiritin

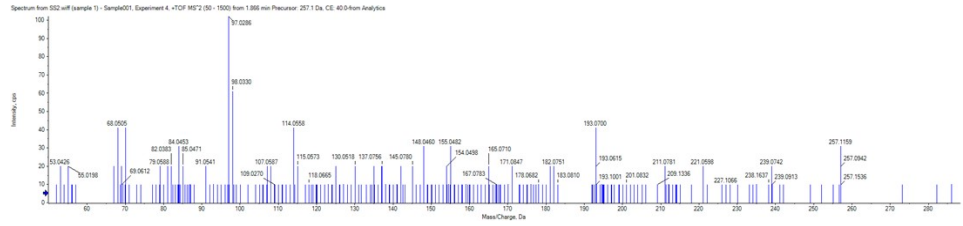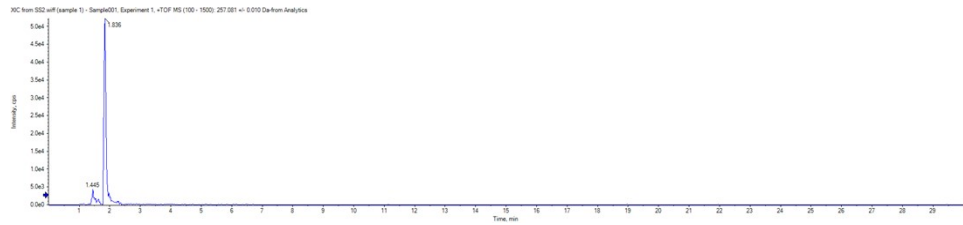

# Isorhamnetin-3-O-glucoside

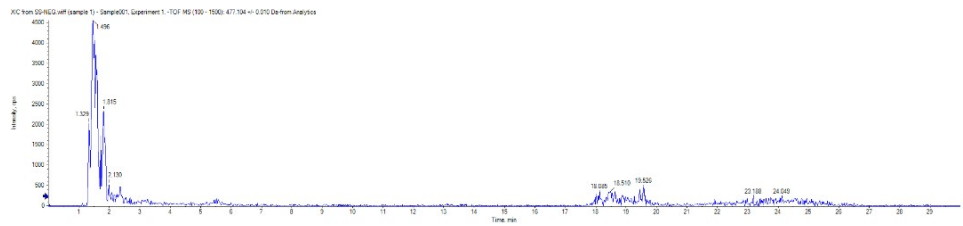

# Glucocochlearin

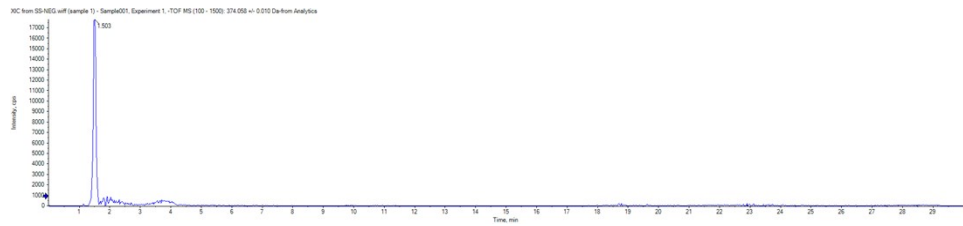

# Fumaric acid

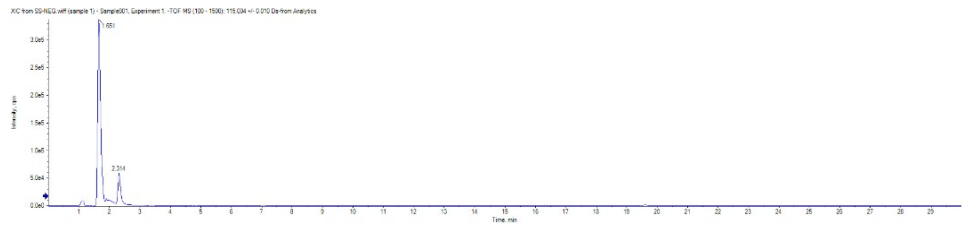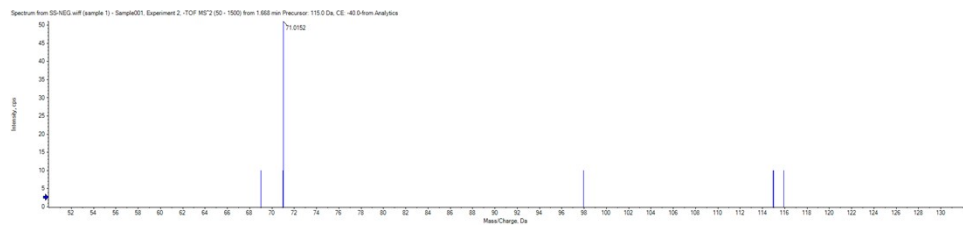

# Picein

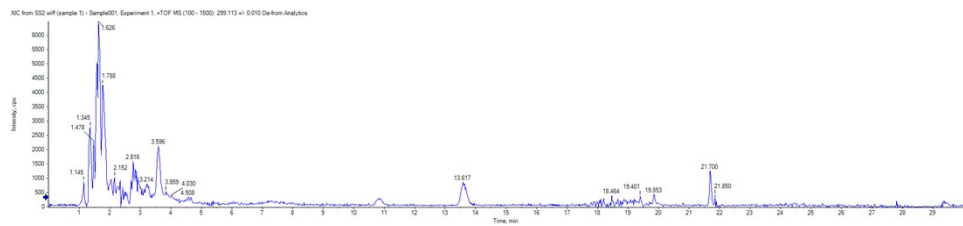

4,4'-dihydroxy-  
3'-  
methoxychalcone

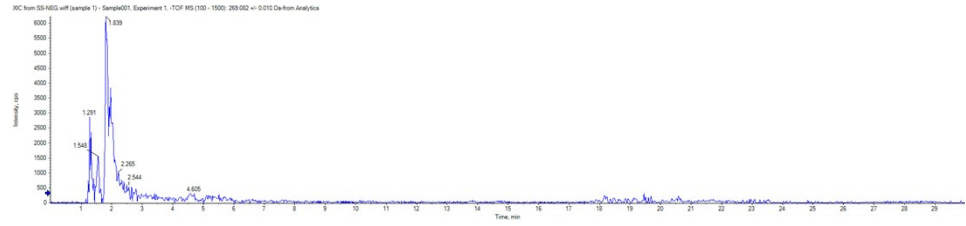

Progoitrin

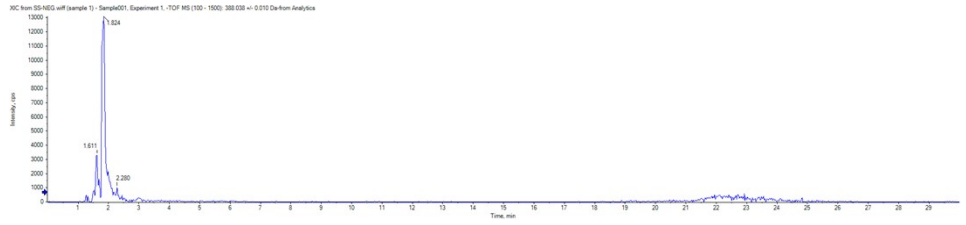

4'-O- $\beta$ -D-  
glucopyranosyl-  
3',4-  
dimethoxychalcone

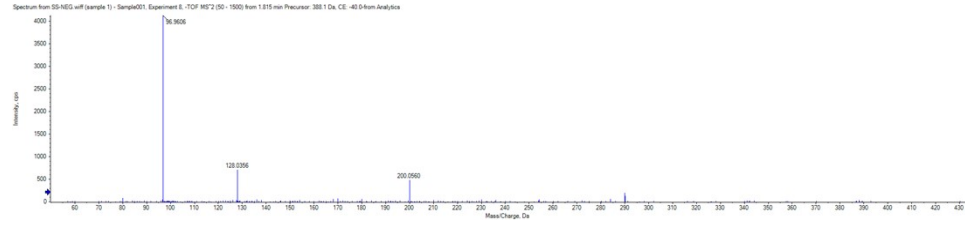

Gluconapoleiferin

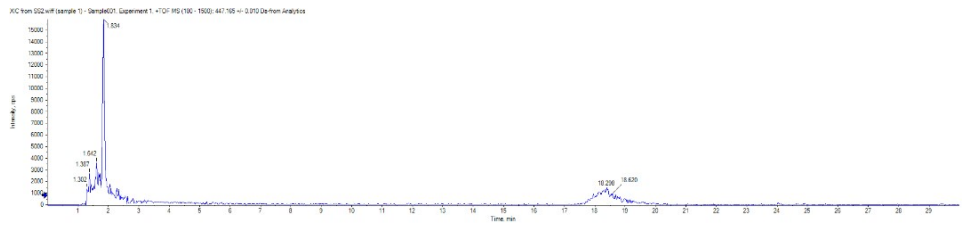

Dihydrosyringin

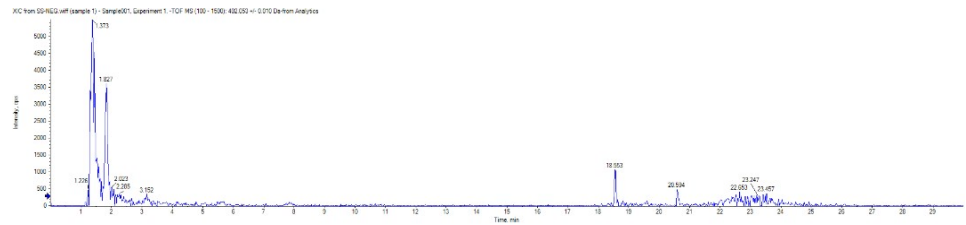

3-Butenyl  
isothiocyanate

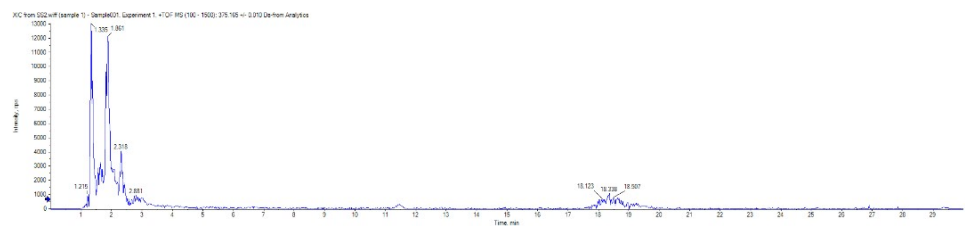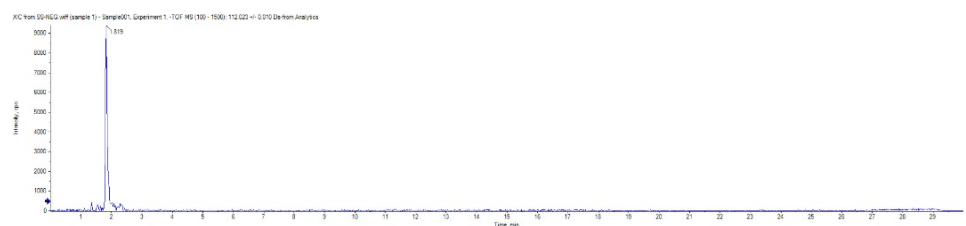

Liquiritigenin

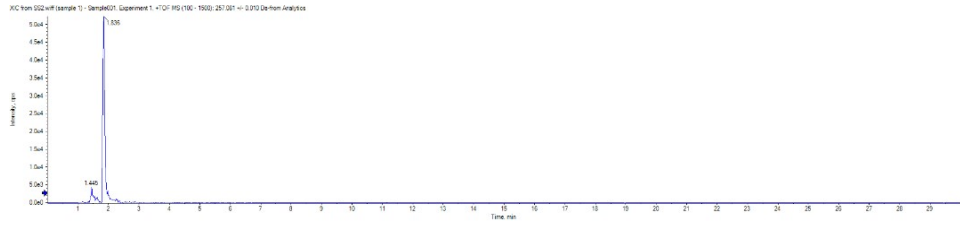

4'-O- $\beta$ -D-glucopyranosyl-4-hydroxy-3'-methoxychalcone

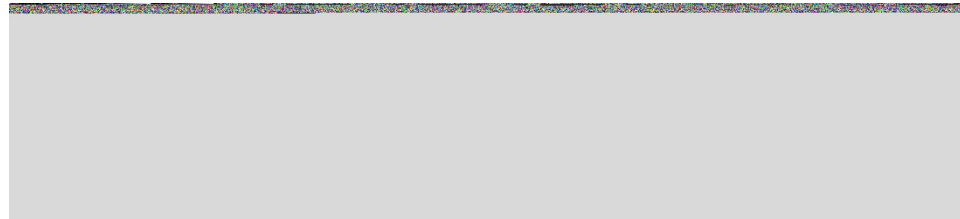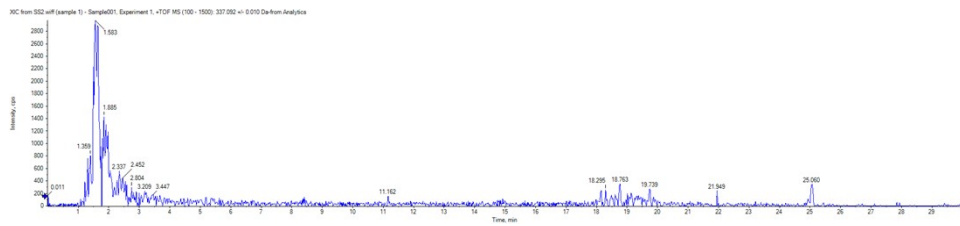

Glucoraphanin

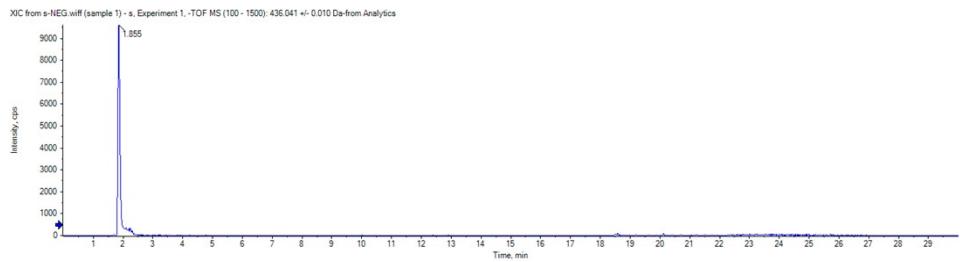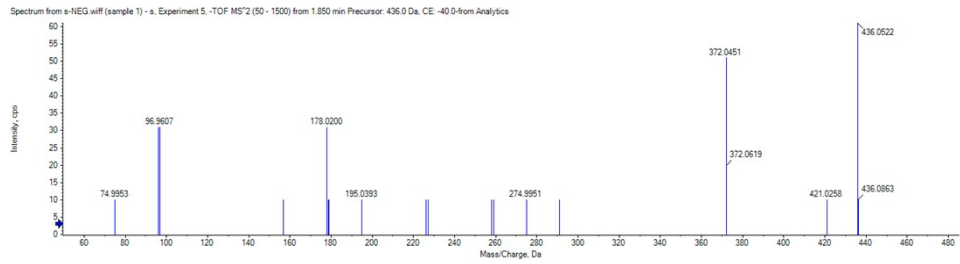

Glucanapin

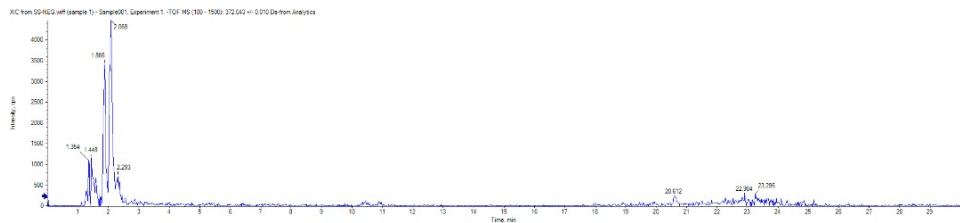

Citric acid

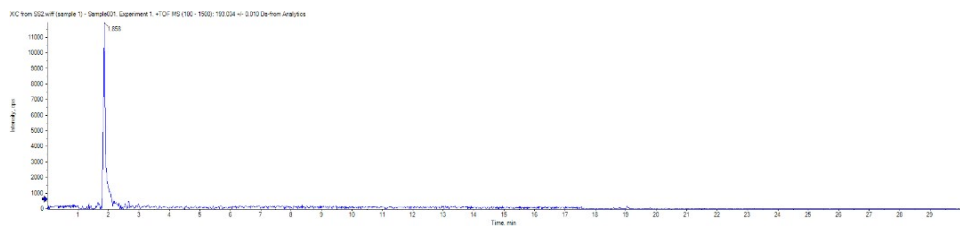

3-Methylbutyl  
isothiocyanate

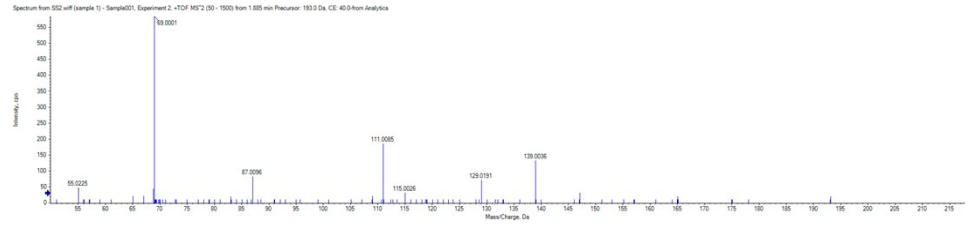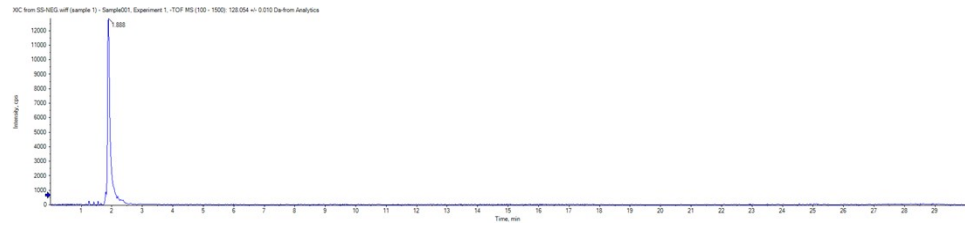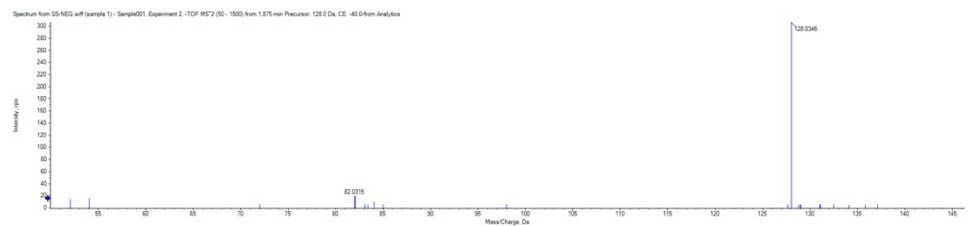

Glucosylsin

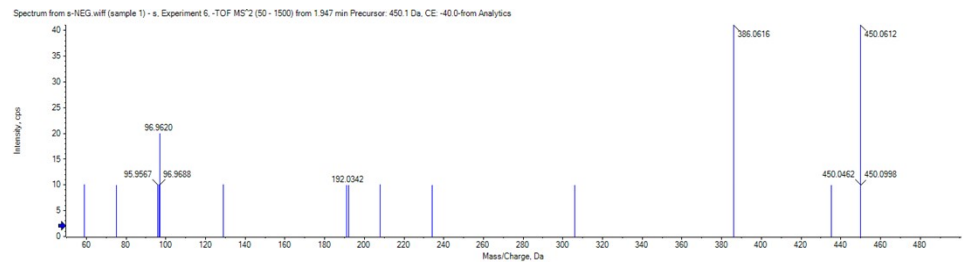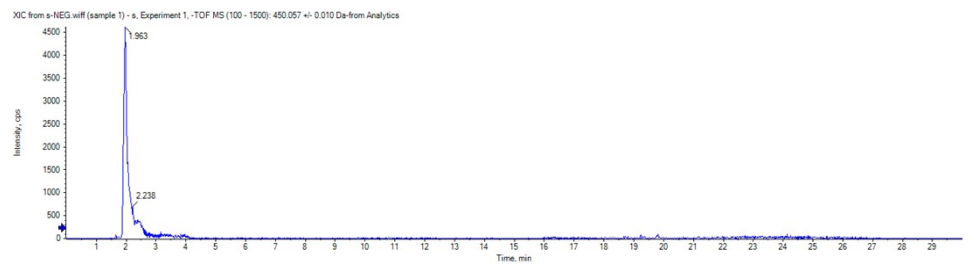

Glucobrassicina  
pin

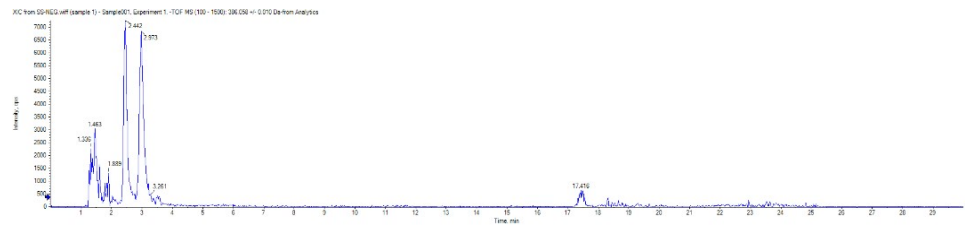

Shikimic acid

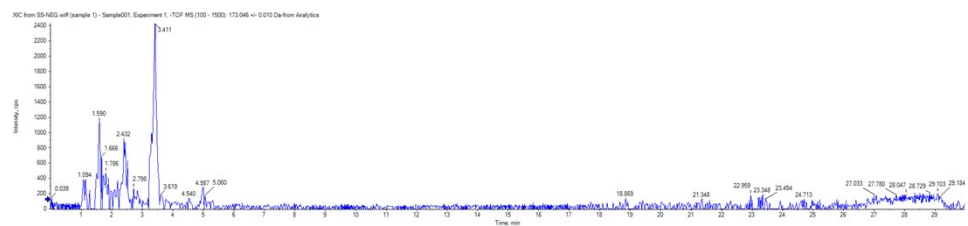

n-butyl  $\beta$ -D-fructofuranoside

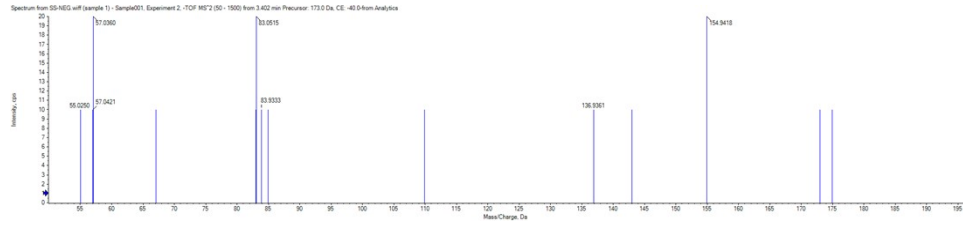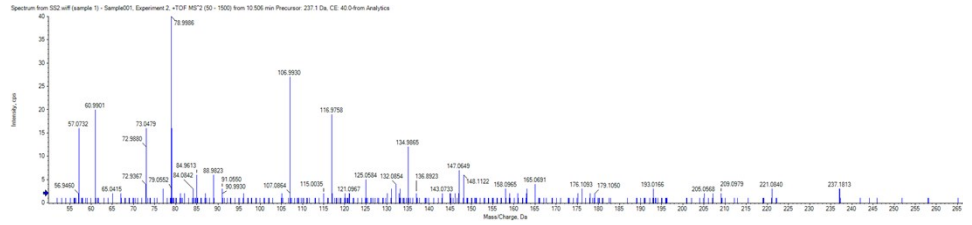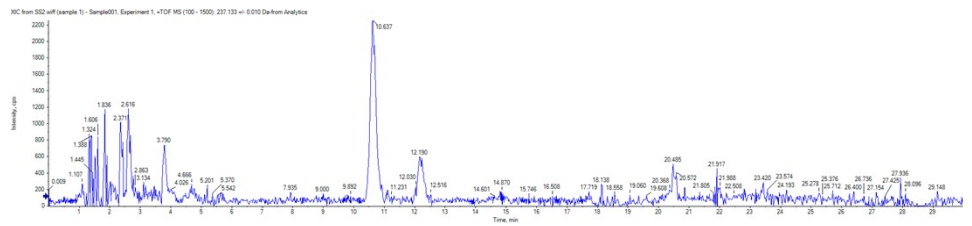

Neoglucobrassicin

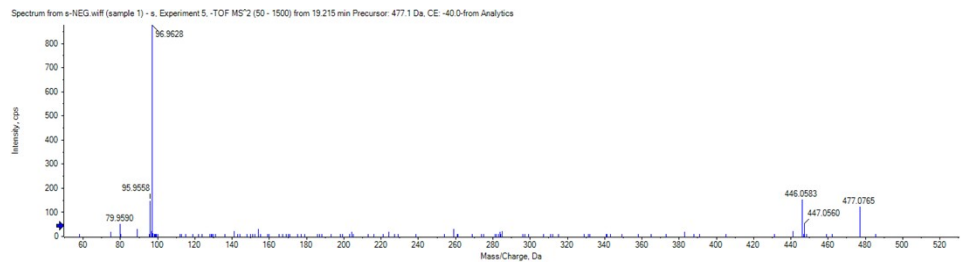

in

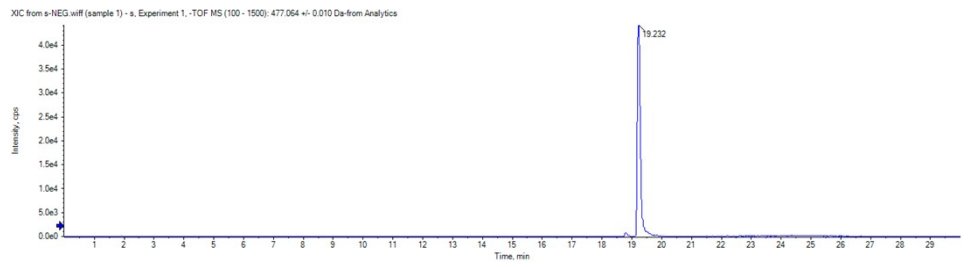

Sinapoyl Malate

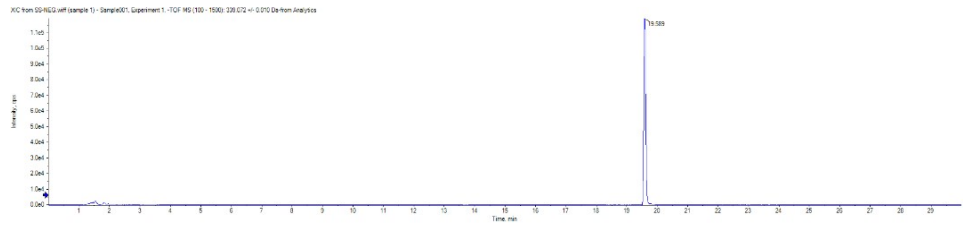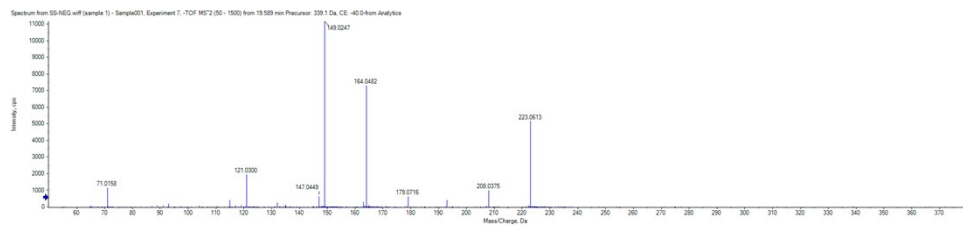

Ferulic acid

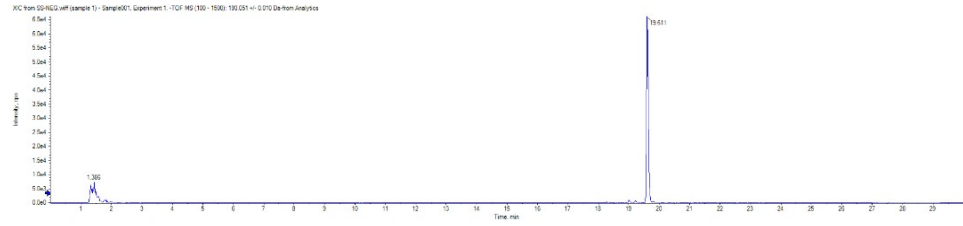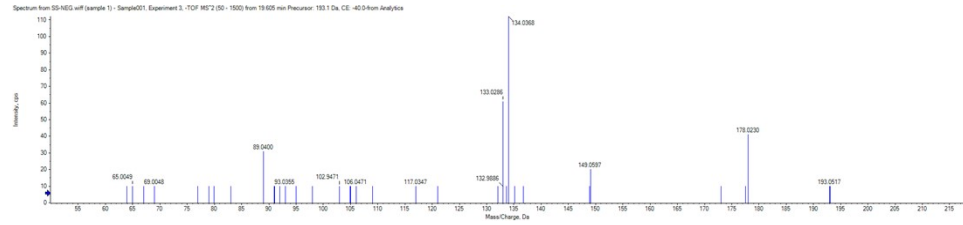

Chlorogenic acid

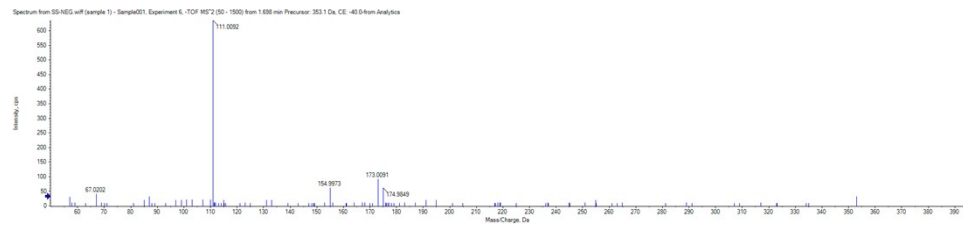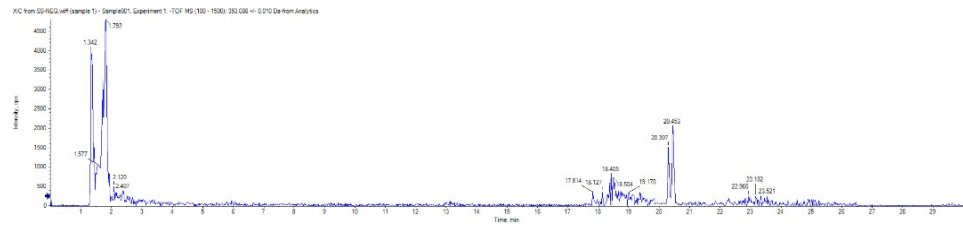

Indoleacetonitril

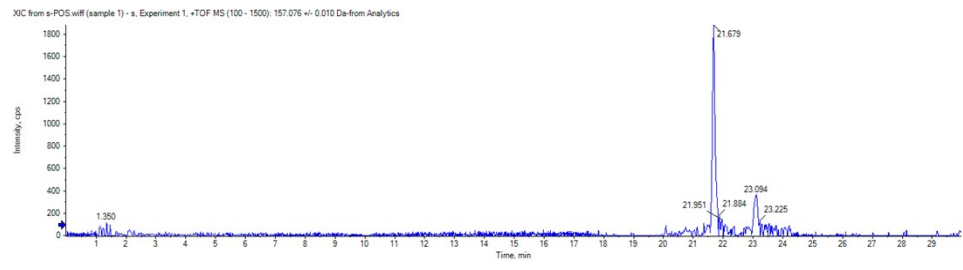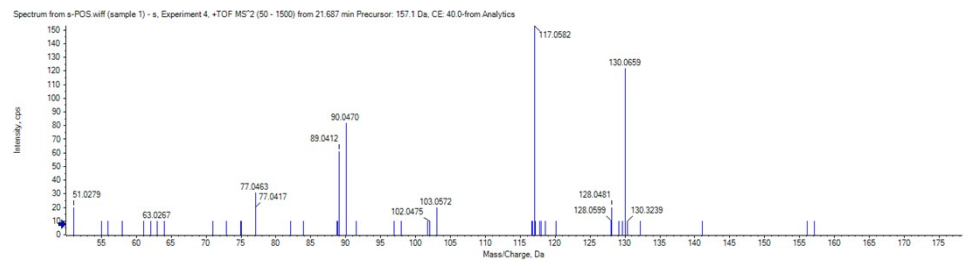

Dihydroactinidiolide

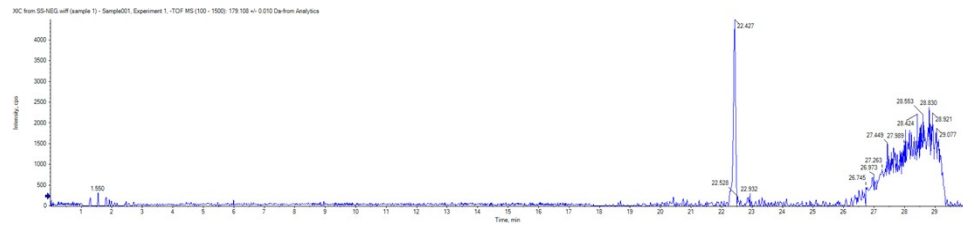



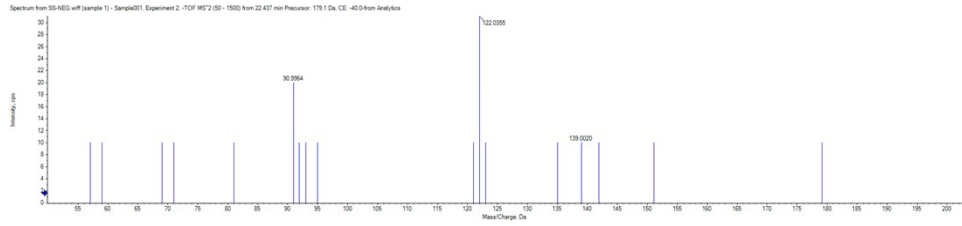

Sinapic acid

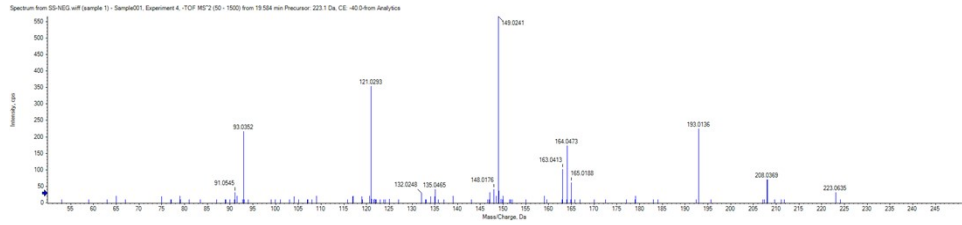

Arvelexin

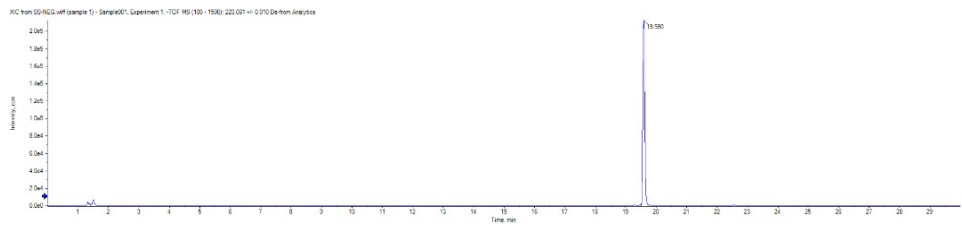

Arvelexin

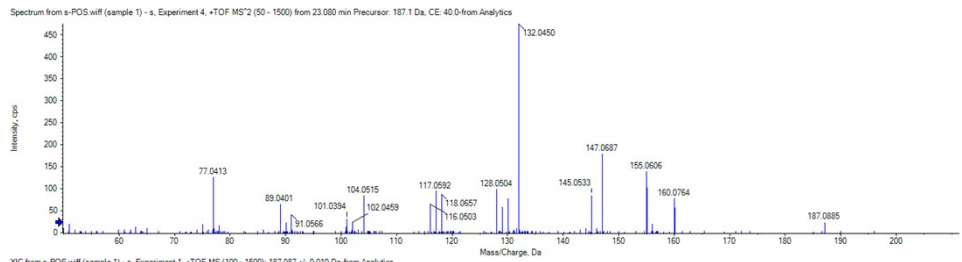

6-paradol

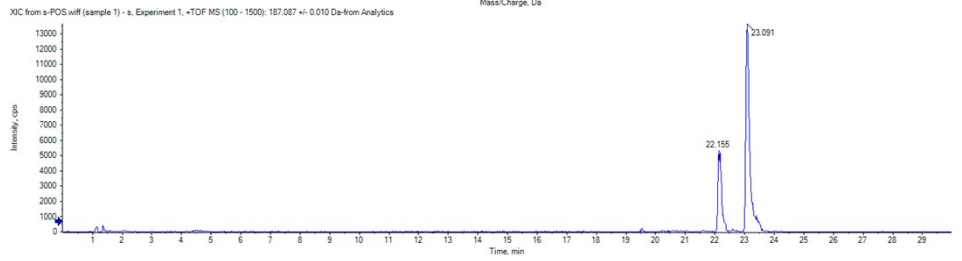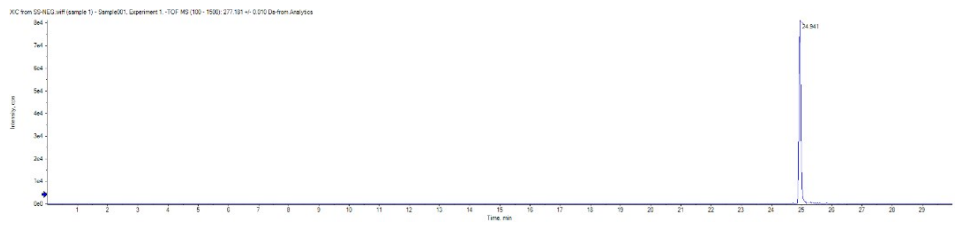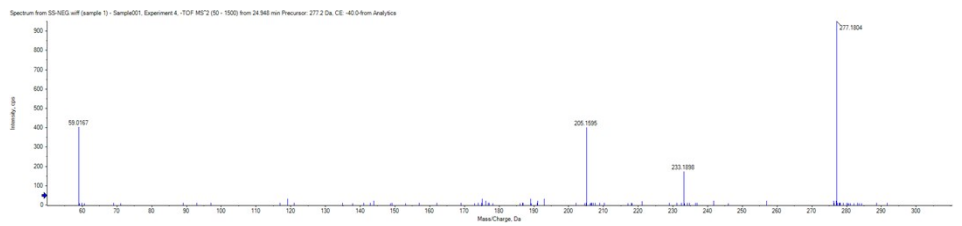

## Trans-6-shogaol

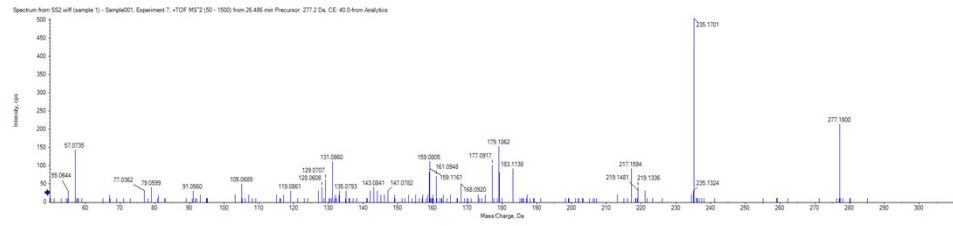

## Caulilexin B

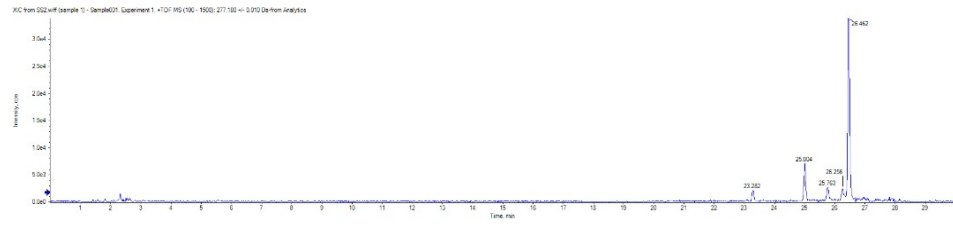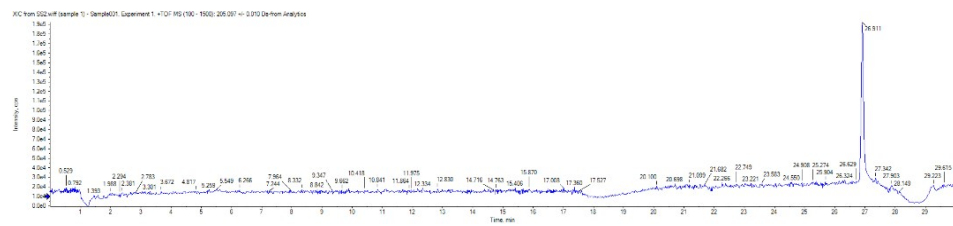

## Erucic acid

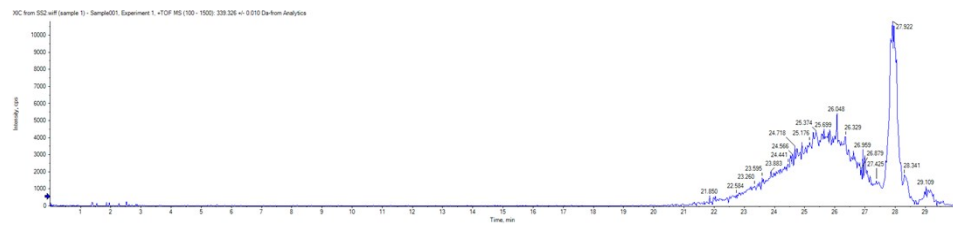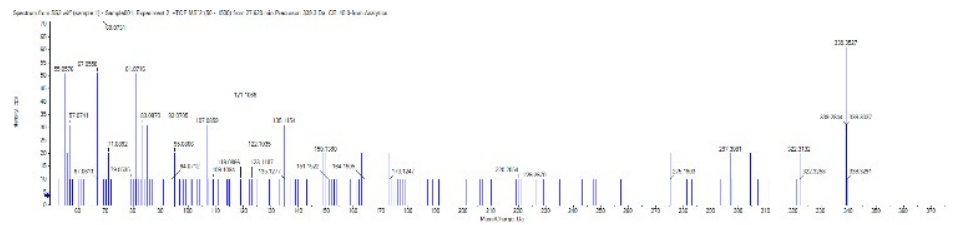

**Table S2 Anti-fatigue target of active ingredients of *Brassica rapa* L.**

|    | <b>Target</b> | <b>Degree</b> | <b>Classification</b>         |    | <b>Target</b> | <b>Degree</b> | <b>Classification</b>         |
|----|---------------|---------------|-------------------------------|----|---------------|---------------|-------------------------------|
| 1  | CYP3A4        | 8             | Enzyme                        | 20 | ABCB1         | 2             | Transporter                   |
| 2  | PDGFRB        | 12            | Kinase                        | 21 | MET           | 8             | Kinase                        |
| 3  | TERT          | 6             | Enzyme                        | 22 | PIK3CB        | 8             | Kinase                        |
| 4  | HSP90AA1      | 26            | Chaperone                     | 23 | AR            | 14            | Nuclear receptor              |
| 5  | SRC           | 34            | Kinase                        | 24 | ESR1          | 14            | Nuclear receptor              |
| 6  | ADORA1        | 2             | G-protein coupled<br>receptor | 25 | ESR2          | 6             | Nuclear receptor              |
| 7  | ADORA3        | 2             | G-protein coupled<br>receptor | 26 | FLT3          | 6             | Kinase                        |
| 8  | ADA           | 4             | Enzyme                        | 27 | BRAF          | 4             | Kinase                        |
| 9  | HRAS          | 24            | Enzyme modulator              | 28 | F2            | 6             | Enzyme                        |
| 10 | MAPK14        | 10            | Kinase                        | 29 | ALK           | 2             | Kinase                        |
| 11 | STAT3         | 28            | Nucleic acid binding          | 30 | MMP2          | 8             | Enzyme                        |
| 12 | EGFR          | 18            | Kinase                        | 31 | NOS2          | 8             | -                             |
| 13 | GSK3B         | 2             | Kinase                        | 32 | ABL1          | 8             | Kinase                        |
| 14 | RAF1          | 10            | Kinase                        | 33 | SLC6A4        | 2             | Transporter                   |
| 15 | MAOA          | 4             | -                             | 34 | TNF           | 8             | Signaling                     |
| 16 | PTGS1         | 4             | Enzyme                        | 35 | MMP9          | 6             | Enzyme                        |
| 17 | PTGS2         | 4             | Enzyme                        | 36 | MPO           | 2             | Enzyme                        |
| 18 | MAOB          | 4             | -                             | 37 | HTR1A         | 2             | G-protein coupled<br>receptor |
| 19 | CYP2C19       | 10            | -                             | 38 | PPARG         | 2             | Nuclear receptor              |
